# Supplementary material for: Event-Related Potential Evidence of Implicit Metric Structure during Silent Reading
Source: MDPI journal article supplement (doi:10.3390/brainsci9080192), 2019-08-08
Supplement: s1 [file s1]

**Table S1.** Distribution of stress patterns occurring at each segment position across all 160 experimental couplets and 160 filler couplets.

| Stress Pattern | Experimental Couplets |     |    |     |    |    | Filler Couplets |     |    |    |    |     |
|----------------|-----------------------|-----|----|-----|----|----|-----------------|-----|----|----|----|-----|
|                | Segment               |     |    |     |    |    | Segment         |     |    |    |    |     |
|                | 1                     | 2   | 3  | 4   | 5  | 6  | 1               | 2   | 3  | 4  | 5  | 6   |
| SW             | 0                     | 18  | 28 | 0   | 12 | 80 | 1               | 7   | 5  | 0  | 4  | 34  |
| WS             | 6                     | 6   | 68 | 3   | 0  | 80 | 6               | 14  | 94 | 9  | 1  | 13  |
| WSW            | 125                   | 102 | 52 | 115 | 69 | 0  | 135             | 117 | 37 | 81 | 17 | 8   |
| WSWW           | 27                    | 17  | 0  | 42  | 44 | 0  | 6               | 9   | 1  | 38 | 77 | 1   |
| WWS            | 2                     | 6   | 12 | 0   | 0  | 0  | 5               | 5   | 12 | 11 | 1  | 1   |
| WWSW           | 0                     | 2   | 0  | 0   | 3  | 0  | 5               | 6   | 2  | 19 | 2  | 1   |
| WWSWW          | 0                     | 0   | 0  | 0   | 0  | 0  | 2               | 0   | 0  | 2  | 17 | 0   |
| SWW            | 0                     | 9   | 0  | 0   | 32 | 0  | 0               | 2   | 0  | 0  | 41 | 0   |
| S              | 0                     | 0   | 0  | 0   | 0  | 0  | 0               | 0   | 9  | 0  | 0  | 102 |

Segments correspond to regions depicted in Table 1 and Figure 1. S = Strong; W = Weak. All columns sum to 160.

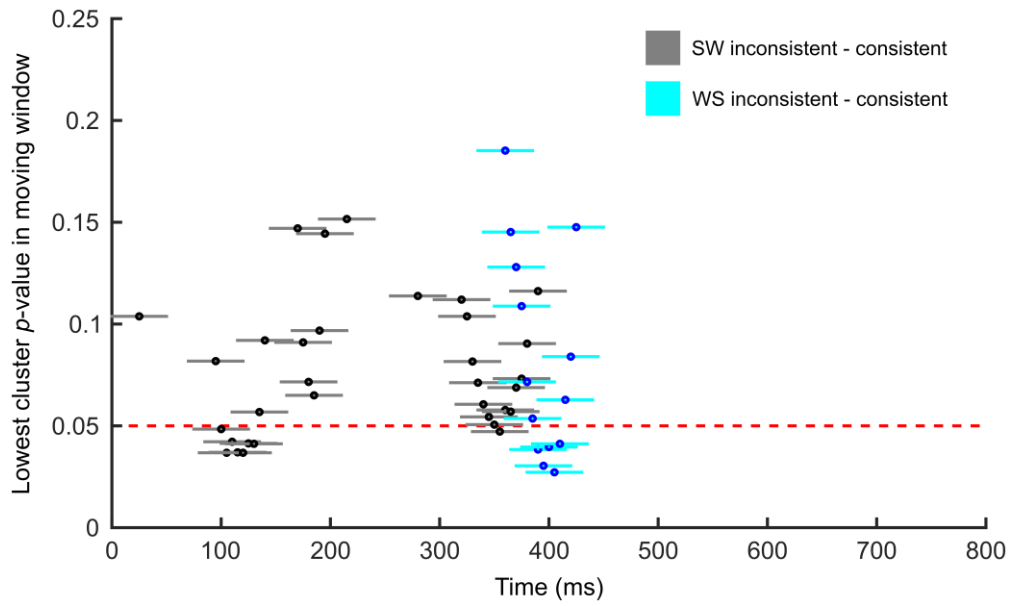

**Figure S1.** Moving window cluster-based permutation test results. Temporal region of interest selection was performed separately for each stress pattern (SW, WS) using a series of mass univariate cluster-based permutation tests comparing mean ERP amplitude for inconsistent vs. consistent targets in a 50 ms moving window (5 ms step). All window steps containing identified clusters are plotted as horizontal lines spanning their duration (with an open circle marking the step center), at a y-value indicating the lowest  $p$ -value calculated for any cluster in that window in the permutation test. See text for cluster inclusion thresholds and permutation test details; note also that no identified clusters contained more than one electrode. Cluster-containing window steps are plotted in grey for the SW stress pattern, and in cyan for the WS stress pattern. Permutation test  $p$ -values indicate for a given cluster the proportion of the shuffled (i.e., chance) iterations of the permutation test in which a cluster of equal or greater magnitude was identified. Any window step containing a cluster of magnitude observed in  $\leq 5\%$  of the shuffled iterations was considered a temporal region of interest. Collapsing across continuous and overlapping significant window steps, three temporal regions of interest were identified: 80–155 ms (SW), 325–375 ms (SW), and 365–435 ms (WS). No clusters were identified for either stress pattern beyond 500 ms after target word onset.
